# Supplementary material
Source: MDPI journal article supplement (https://www.mdpi.com/2813-3145/1/1/3)
Supplement: s1 [file s1]

**Supplemental Materials:**

Glycosylation of Ganoderic Acid F by *Bacillus* Glycosyltransferase

Te-Sheng Chang

Department of Biological Sciences and Technology, National University of Tainan, Tainan 700,

Taiwan

Correspondence: mozyme2001@gmail.com; Tel.: +886-6-2602137; Fax: +886-6-2606153

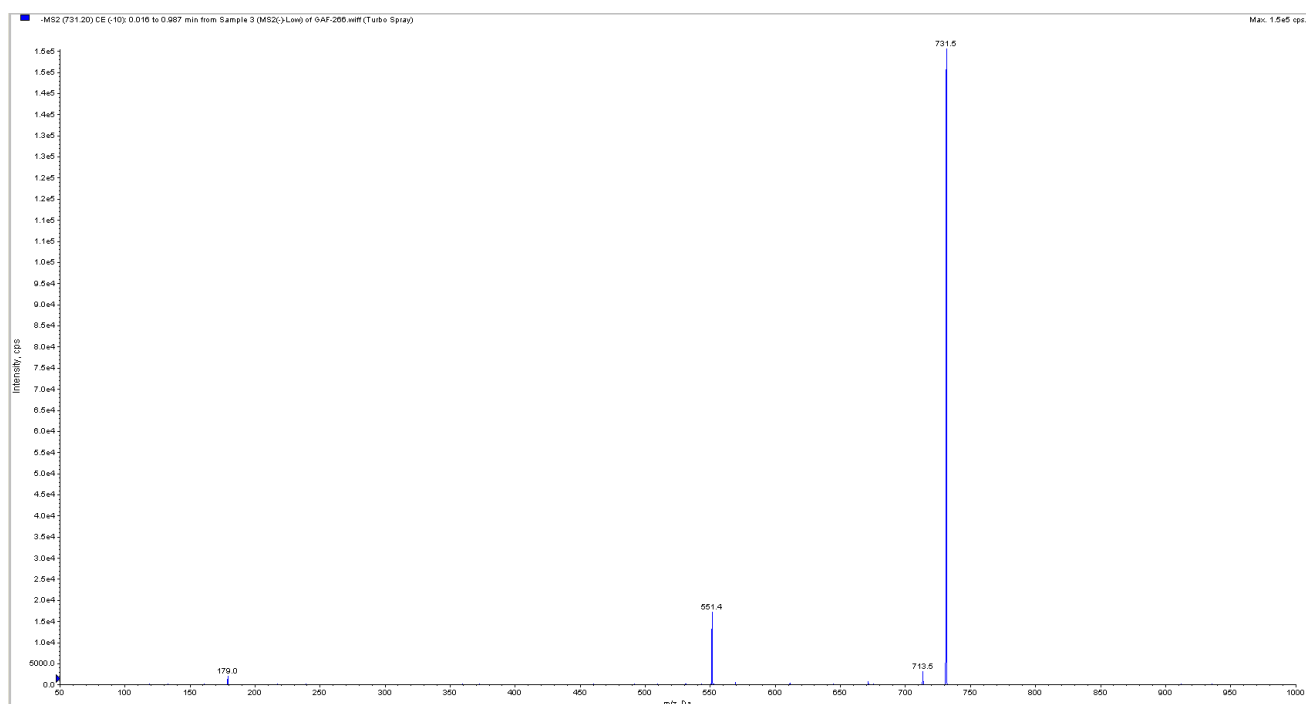

(a)

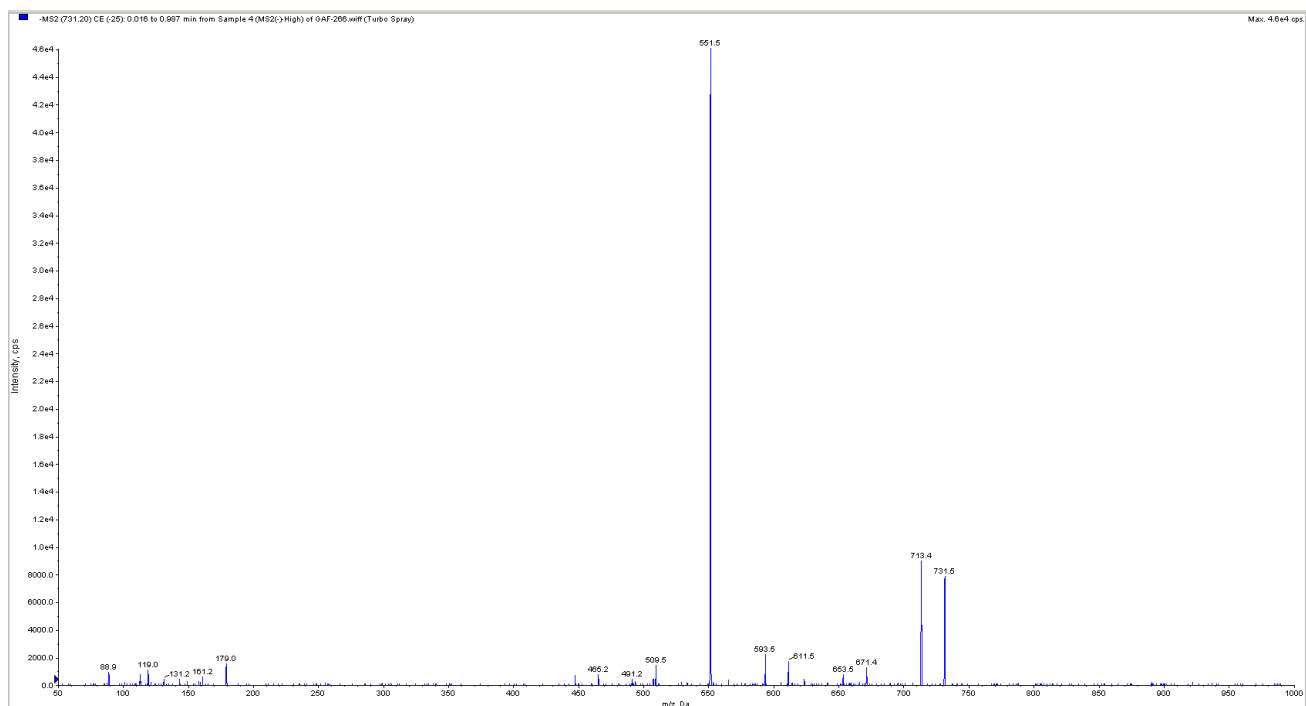

(b)

**Figure S1.** The mass (a) and mass-mass (b) analysis of compound (1) at the negative mode. A significant signal at  $m/z$  731.5 in (a) and two significant signals at  $m/z$  551.5 and 179.0 in (b).
